# Supplementary material for: Efficacy of pancreatic enzyme replacement therapy in chronic pancreatitis: systematic review and meta-analysis
Source: PubMed Central journal article supplement (PMC5530474; doi:10.1136/gutjnl-2016-312529), 2016-12-09
Supplement: gutjnl-2016-312529supp001.pdf [file gutjnl-2016-312529supp001.pdf]

**Table S1.** Detailed Jadad score components\*

| Study                                 | Jadad score | Randomization | Double blinding | Drop-outs or withdrawals | Allocation concealment |
|---------------------------------------|-------------|---------------|-----------------|--------------------------|------------------------|
| Graham <sup>[32]</sup>                | 1           | 1             | 0               | 0                        | N                      |
| Dutta et al <sup>[33]</sup>           | 1           | 1             | 0               | 0                        | N                      |
| Lankish et al <sup>[34]</sup>         | 1           | 1             | 0               | 0                        | N                      |
| Halgreen et al <sup>[35]</sup>        | 3           | 1             | 2               | 0                        | N                      |
| Gouerou et al <sup>[36]</sup>         | 2           | 1             | 0               | 1                        | N                      |
| Jorgensen et al <sup>[37]</sup>       | 1           | 1             | 0               | 0                        | N                      |
| Paris et al <sup>[38]</sup>           | 3           | 1             | 1               | 1                        | N                      |
| Delhaye et al <sup>[39]</sup>         | 2           | 1             | 0               | 1                        | N                      |
| Opekun Jr et al <sup>[40]</sup>       | 1           | 1             | 0               | 0                        | N                      |
| Halm et al <sup>[41]</sup>            | 4           | 1             | 2               | 1                        | N                      |
| O'Keefe et al <sup>[42]</sup>         | 2           | 1             | 0               | 1                        | N                      |
| Domínguez-Muñoz et al <sup>[43]</sup> | 2           | 2             | 0               | 0                        | Y                      |
| Vecht et al <sup>[44]</sup>           | 2           | 1             | 1               | 0                        | N                      |
| Safdi et al <sup>[45]</sup>           | 3           | 1             | 1               | 1                        | N                      |
| Whitcomb et al <sup>[46]</sup>        | 5           | 2             | 2               | 1                        | Y                      |
| Toskes et al <sup>[47]</sup>          | 3           | 1             | 1               | 1                        | N                      |
| Thorat et al <sup>[48]</sup>          | 5           | 2             | 2               | 1                        | Y                      |

Y, reported; N, not reported.

\*One point if study described as randomized, further point if method described and appropriate but one point deducted if method described and inappropriate; one point if study described as double blind, further point if method described and appropriate but one point deducted if method described and inappropriate; one point if withdrawals and/or drop outs described with reasons; maximum total 5 points.<sup>[25]</sup>
