# Supplementary material for: Efficacy of pancreatic enzyme replacement therapy in chronic pancreatitis: systematic review and meta-analysis
Source: PubMed Central journal article supplement (PMC5530474; doi:10.1136/gutjnl-2016-312529), 2016-12-09
Supplement: gutjnl-2016-312529supp002.pdf [file gutjnl-2016-312529supp002.pdf]

**Table S2.** Baseline characteristics of patients in included studies\*

| Study                                 | No. patients (analysed) | Age (year) <sup>†</sup>          | Male/ Female | Ethnicity                         | Body mass index (kg/m <sup>2</sup> ) <sup>†</sup> | No. with coexisting diabetes mellitus | No. after pancreatic surgery | Aetiology                                                     |
|---------------------------------------|-------------------------|----------------------------------|--------------|-----------------------------------|---------------------------------------------------|---------------------------------------|------------------------------|---------------------------------------------------------------|
| Graham <sup>[32]</sup>                | 6 (6)                   | 44-59                            | 4/2          | NR                                | NR                                                | 0                                     | 0                            | Alcoholic 6                                                   |
| Dutta et al <sup>[33]</sup>           | 6 (6)                   | 50 (43-58)                       | NR           | NR                                | NR                                                | 3                                     | Yes, number not given        | Alcoholic 6                                                   |
| Lankisch et al <sup>[34]</sup>        | 8 (8)                   | NR                               | 7/1          | NR                                | NR                                                | NR                                    | Yes, number not given        | Alcoholic 7<br>Idiopathic 1                                   |
| Halgreen et al <sup>[35]</sup>        | 11 (11)                 | 51 (29-59)                       | 6/5          | NR                                | NR                                                | 6                                     | 0                            | Alcoholic 4; Idiopathic 3;<br>Obstructive 3; Hyperlipidemic 1 |
| Gouerou et al <sup>[36]</sup>         | 35 (23)                 | 50 (18-75)                       | 33/2         | NR                                | NR                                                | 16                                    | 25, type unknown             | Alcoholic 33<br>Idiopathic 2                                  |
| Jorgensen et al <sup>[37]</sup>       | 23 (23)                 | 51 (34-73)                       | 18/5         | NR                                | NR                                                | NR                                    | 0                            | NR                                                            |
| Paris et al <sup>[38]</sup>           | 60 (60)                 | 47                               | 51/9         | NR                                | NR                                                | NR                                    | Yes, number not given        | Alcoholic 60                                                  |
| Delhaye et al <sup>[39]</sup>         | 25 (25)                 | 52.4 (1.7)                       | 24/1         | NR                                | NR                                                | 16                                    | 9 <sup>‡</sup>               | Alcoholic 23<br>Idiopathic 2                                  |
| Opekun Jr et al <sup>[40]</sup>       | 6 (6)                   | 37-63                            | NR           | NR                                | NR                                                | 2                                     | 0                            | Alcoholic 5; Idiopathic 1                                     |
| Halm et al <sup>[41]</sup>            | 37 (23)                 | 52 (10)                          | 30/7         | NR                                | 19 (3)                                            | NR                                    | 0                            | NR                                                            |
| O'Keefe et al <sup>[42]</sup>         | 29 (29)                 | G1: 49.1 (1.8)<br>G2: 57.8 (2.1) | 28/1         | NR                                | G1: 18.9 (0.7)<br>G2: 22.3 (1.0)                  | 18                                    | 9 <sup>§</sup>               | Alcoholic 27; Idiopathic 2                                    |
| Domínguez-Muñoz et al <sup>[43]</sup> | 24 (24)                 | 50 (36-76)                       | 19/5         | NR                                | NR                                                | No                                    | 0                            | NR                                                            |
| Vecht et al <sup>[44]</sup>           | 16 (16)                 | 53 (3)                           | 13/3         | NR                                | NR                                                | 6                                     | 4 <sup>  </sup>              | Alcoholic 9; Obstructive 1;<br>Idiopathic 6                   |
| Safdi et al <sup>[45]</sup>           | 27 (27)                 | G1: 51.9 (2.7)<br>G2: 51 (3)     | 9/18         | White 16<br>AA 10<br>Filipino 1   | NR                                                | NR                                    | 0                            | NR                                                            |
| Whitcomb et al <sup>[46]</sup>        | 54 (54) <sup>¶</sup>    | G1: 52 (9.6)<br>G2: 50.5 (7.7)   | 39/15        | White 53<br>Black 1               | G1: 23.4 (4.4)<br>G2: 22.2 (4.4)                  | NR                                    | 14, type unknown             | NR                                                            |
| Toskes et al <sup>[47]</sup>          | 82 (75)                 | 51.9 (12.1)                      | 53/29        | White 17<br>Black 2<br>Hispanic 2 | 23.4 (4.4)                                        | NR                                    | Yes <sup>**</sup>            | NR                                                            |
| Thorat et al <sup>[48]</sup>          | 62 (61)                 | 44 (18-62)                       | 47/15        | Asian 62                          | G1: 19.1 (3.1)<br>G2: 18.4 (2.5)                  | 30                                    | 18, type unknown             | NR                                                            |

NR, not reported; G, group; AA, African American.

\*Socioeconomic status and cigarette smoking not reported in any study included.

†Expressed either as mean, mean (standard deviation), range, or median (range).

‡Left pancreatectomy, 6; pancreatico-jejunostomy, 2; and cystogastromy, 1.

§Pancreatic decompression surgery, 9.

||Pancreatic drainage, 2; duodenum preserving resection of the head of the pancreas, 2.

¶One patient who had pancreatic cancer resection was unavoidably included in the analysis.

\*\*Partial or distal pancreatic resection.
