# Supplementary material for: Efficacy of pancreatic enzyme replacement therapy in chronic pancreatitis: systematic review and meta-analysis
Source: PubMed Central journal article supplement (PMC5530474; doi:10.1136/gutjnl-2016-312529), 2016-12-09
Supplement: gutjnl-2016-312529supp003.pdf [file gutjnl-2016-312529supp003.pdf]

**Table S3.** Composition and administration schedules of PERT

| Study                           | Formulation per capsule (lipase/other enzymes)                                                                                                                                                                                                                           | Formulation per capsule (enzyme activity in USP) <sup>†</sup>                                                                                                                                                                                                  | Delivery system <sup>†</sup>                                                                                                                | Doses and administration schedule <sup>†</sup>                                                                                                                                                                                            | Antacids <sup>§</sup> |
|---------------------------------|--------------------------------------------------------------------------------------------------------------------------------------------------------------------------------------------------------------------------------------------------------------------------|----------------------------------------------------------------------------------------------------------------------------------------------------------------------------------------------------------------------------------------------------------------|---------------------------------------------------------------------------------------------------------------------------------------------|-------------------------------------------------------------------------------------------------------------------------------------------------------------------------------------------------------------------------------------------|-----------------------|
| Graham <sup>[32]</sup>          | Ilozyme (U)<br><i>Lipase: 3600</i><br><br>Pancrease (U)<br><i>Lipase: 2005</i>                                                                                                                                                                                           | The same as original                                                                                                                                                                                                                                           | Ilozyme<br><i>Non-EC, MT</i><br><br>Pancrease<br><i>EC, MS</i>                                                                              | Ilozyme<br><i>Meal: 3/6/12 tablets tid</i><br><br>Pancrease<br><i>Meal: 3 capsules tid</i>                                                                                                                                                | NR                    |
| Dutta et al <sup>[33]</sup>     | Pancreatin (U)<br><i>Lipase: 684 ± 52, protease: 795 ± 19</i><br><br>Cotazyme (U)<br><i>Lipase: 8804 ± 159, protease: 9937 ± 243</i><br><br>Pancrease TM (U)<br><i>Lipase: 4933 ± 64, protease: 6183 ± 363</i>                                                           | Pancreatin<br><i>Lipase: 684, protease: 795</i><br><br>Cotazyme<br><i>Lipase: 8804, protease: 9937</i><br><br>Pancrease TM<br><i>Lipase: 4933, protease: 6183</i>                                                                                              | Pancreatin:<br><i>Non-EC, MS</i><br><br>Cotazyme:<br><i>Non-EC, MT</i><br><br>Pancrease TM<br><i>EC, MT</i>                                 | Pancreatin<br><i>Meal: 10 tablets tid</i><br><br>Cotazyme<br><i>Meal: 4 capsules tid</i><br><br>Pancrease TM<br><i>Meal: 4/8 capsules tid</i>                                                                                             | NR                    |
| Lankisch et al <sup>[34]</sup>  | Pankreon <sup>®</sup> 700 (FIP)<br><i>Lipase: 28000, protease: 1500, amylase: 22000</i><br><br>Kreon <sup>®</sup><br><i>Lipase: 10000</i>                                                                                                                                | Pankreon <sup>®</sup> 700<br><i>Lipase: 28000, protease: 93750, amylase: 91300</i><br><br>Kreon <sup>®</sup><br><i>Lipase: 10000</i>                                                                                                                           | Pankreon <sup>®</sup> 700<br><i>Non-EC, MT</i><br><br>Kreon <sup>®</sup><br><i>EC, granules</i>                                             | Pankreon <sup>®</sup> 700<br><i>Meal: 3 doses tid</i><br><br>Kreon <sup>®</sup><br><i>Meal: 6 capsules tid</i>                                                                                                                            | Yes                   |
| Halgreen et al <sup>[35]</sup>  | Pancrease <sup>®</sup> (NFU)<br><i>Lipase: 4000, protease: 25000, amylase: 20000</i>                                                                                                                                                                                     | NA                                                                                                                                                                                                                                                             | Pancrease <sup>®</sup><br><i>EC, MS</i>                                                                                                     | Pancrease <sup>®</sup><br><i>Meal: 2 capsules tid; snack: 1 capsule bid</i>                                                                                                                                                               | NR                    |
| Gouerou et al <sup>[36]</sup>   | NA                                                                                                                                                                                                                                                                       | NA                                                                                                                                                                                                                                                             | Alipase <sup>®</sup><br><i>EC, MS</i><br><br>Eurobiol<br><i>Non-EC</i>                                                                      | Alipase <sup>®</sup><br><i>Meal: 9 capsules qd</i><br><br>Eurobiol<br><i>Meal: 3 vials qd</i>                                                                                                                                             | NR                    |
| Jorgensen et al <sup>[37]</sup> | Pancrease <sup>®</sup> (EPU)<br><i>Lipase: 5000, protease: 330, amylase: 2900</i><br><br>Pankreon <sup>®</sup> (EPU)<br><i>Lipase: 8000, protease: 450, amylase: 9000</i><br><br>Pankreatin <sup>®</sup> (EPU)<br><i>Lipase: 180000, protease: 7975, amylase: 191250</i> | Pancrease <sup>®</sup><br><i>Lipase: 5000, protease: 20625, amylase: 12035</i><br><br>Pankreon <sup>®</sup><br><i>Lipase: 8000, protease: 28125, amylase: 37350</i><br><br>Pankreatin <sup>®</sup><br><i>Lipase: 180000, protease: 498437, amylase: 793791</i> | Pancrease <sup>®</sup><br><i>EC, MS</i><br><br>Pankreon <sup>®</sup><br><i>EC, MS</i><br><br>Pankreatin <sup>®</sup><br><i>EC, granules</i> | Pancrease <sup>®</sup><br><i>Meal: 2 capsules tid; snack: 1 capsule bid</i><br><br>Pankreon <sup>®</sup><br><i>Meal: 2 capsules tid; snack: 1 capsule bid</i><br><br>Pankreatin <sup>®</sup><br><i>Meal: 15 ml tid; snack: 7.5 ml bid</i> | No                    |
| Paris et al <sup>[38]</sup>     | Panzytrat (EPU)<br><i>Lipase: 25000, protease: 1250, amylase: 22500</i>                                                                                                                                                                                                  | Panzytrat<br><i>Lipase: 25000, protease: 78125, amylase: 93375</i>                                                                                                                                                                                             | Panzytrat<br><i>EC, MT</i>                                                                                                                  | Panzytrat<br><i>Meals: 6 capsules tid</i>                                                                                                                                                                                                 | Not allowed           |
| Delhaye et al <sup>[39]</sup>   | Pancrease HL (EPU)<br><i>Lipase: 25000, protease: 1250, amylase 22500</i><br><br>Creon<br><i>Lipase: 8000, protease: 450, amylase: 9000</i>                                                                                                                              | Pancrease HL<br><i>Lipase: 25000, protease: 78125, amylase 93375</i><br><br>Creon<br><i>Lipase: 8000, protease: 28125, amylase: 37350</i>                                                                                                                      | Pancrease HL<br><i>EC, MS</i><br><br>Creon<br><i>EC, MS</i>                                                                                 | Pancrease HL<br><i>Meal: 1 capsule tid</i><br><br>Creon<br><i>Meal: 3 capsule tid</i>                                                                                                                                                     | Yes                   |
| Opekun et al <sup>[40]</sup>    | Pancrease MT4 (USP)<br><i>Lipase: 4000, protease: 12000, amylase: 12000</i><br><br>Pancrease MT10 (USP)<br><i>Lipase: 10000, protease: 30000, amylase: 30000</i><br>Pancrease MT16<br><i>Lipase: 16000, protease: 48000, amylase: 48000</i>                              | The same as original                                                                                                                                                                                                                                           | Pancrease<br>MT4/MT10/MT16<br><i>EC, MT</i>                                                                                                 | Pancrease MT4<br><i>Meal: 2 capsules tid (before)</i><br><br>Pancrease MT10<br><i>Meal: 2 capsules tid (before)</i><br>Pancrease MT16<br><i>Meal: 2 capsules tid (before)</i>                                                             | Not allowed           |

|                                       |                                                                                                                                                               |                                                                                                                                                         |                                                                                                                       |                                                                                                                                                   |             |
|---------------------------------------|---------------------------------------------------------------------------------------------------------------------------------------------------------------|---------------------------------------------------------------------------------------------------------------------------------------------------------|-----------------------------------------------------------------------------------------------------------------------|---------------------------------------------------------------------------------------------------------------------------------------------------|-------------|
| Halm et al <sup>[41]</sup>            | Creon 10000 MS (EPU)<br><i>Lipase: 10000, protease: 600, amylase: 8000</i><br><br>Creon 10000 MMS (EPU)<br><i>Lipase: 10000, Protease: 600, Amylase: 8000</i> | Creon 10000 MS<br><i>Lipase: 10000, protease: 37500, amylase: 33200</i><br><br>Creon 10000 MMS<br><i>Lipase: 10000, protease: 37500, amylase: 33200</i> | Creon 10000 MS<br><i>EC, MS</i><br>Creon 10000 MMS<br><i>EC, MMS</i>                                                  | Creon 10000 MS<br><i>Meal: 4 capsules tid; snack: 2 capsules bid</i><br><br>Creon 10000 MMS<br><i>Meal: 4 capsules tid; snack: 2 capsules bid</i> | Not allowed |
| O'Keefe et al <sup>[42]</sup>         | Creon 10 (USP)<br><i>Lipase: 10000, protease: 37500, amylase: 33200</i>                                                                                       | The same as original                                                                                                                                    | Creon 10<br><i>EC, MMS</i>                                                                                            | Creon<br><i>Meal: 4 capsules tid; snack: 2 capsules bid</i>                                                                                       | Not allowed |
| Domínguez-Muñoz et al <sup>[43]</sup> | Creon 10000 (EPU)<br><i>Lipase: 10000, protease: 600, amylase: 8000</i>                                                                                       | Creon 10000<br><i>Lipase: 10000, protease: 37500, amylase: 33200</i>                                                                                    | Creon 10000<br><i>EC, MMS</i>                                                                                         | Creon 10000<br><i>Meal and snack: 4 capsules tid (before, after or during)</i>                                                                    | Not allowed |
| Vecht et al <sup>[44]</sup>           | Pancrease (FIP)<br><i>Lipase: 5000, protease: 330, amylase: 2900</i>                                                                                          | Pancrease<br><i>Lipase: 5000, protease: 20625, amylase: 12035</i>                                                                                       | Pancrease<br><i>EC, MS</i>                                                                                            | Pancrease<br><i>Meal and snack: 2 or 4 capsules tid for low or high does, respectively (before)</i>                                               | Yes         |
| Safdi et al <sup>[45]</sup>           | Creon 10 (USP)<br><i>Lipase: 10000, protease: 37500, amylase: 33200</i>                                                                                       | The same as original                                                                                                                                    | Creon 10<br><i>EC, MMS</i>                                                                                            | Creon 10<br><i>Meal: 4 capsules tid; snack: 2 capsules bid</i>                                                                                    | Not allowed |
| Whitcomb et al <sup>[46]</sup>        | Creon 12000 (USP)<br><i>Lipase: 12000, protease: 38000, amylase: 60000</i>                                                                                    | The same as original                                                                                                                                    | Creon 12000<br><i>EC, MMS</i><br><i>Delayed-release</i>                                                               | Creon 12000<br><i>Meal: 6 capsules tid; snack: 3 capsules bid</i>                                                                                 | Allowed     |
| Toskes et al <sup>[47]</sup>          | Zenpep 5000 (USP)<br><i>Lipase: 5000, protease: 17000, amylase: 27000</i><br><br>Zenzep 20000 (USP)<br><i>Lipase: 20000, protease: 68000, amylase: 109000</i> | The same as original                                                                                                                                    | Zenpep 5000<br><i>EC, MS</i><br><i>Delayed-release</i><br><br>Zenpep 20000<br><i>EC, MS</i><br><i>Delayed-release</i> | Zenpep 5000<br><i>Meal: 2 capsules tid; snack: 1 capsule bid</i><br><br>Zenpep 2000<br><i>Meal: 2 capsules tid; snack: 1 capsule bid</i>          | Not allowed |
| Thorat et al <sup>[48]</sup>          | Creon 40000 (EPU)<br><i>Lipase: 40000, protease: 1600, amylase: 25000</i>                                                                                     | Creon 40000<br><i>Lipase: 40000, protease: 100000, amylase: 103750</i>                                                                                  | Creon 40000<br><i>EC, MMS</i>                                                                                         | Creon 40000<br><i>Meal: 2 capsules tid; snack: 1 capsule bid</i>                                                                                  | Allowed     |

USP, United States Pharmacopoeia; NR, not reported; MT, microtablets; NA, not available; MS, microspheres; MMS, minimicrospheres; EC, enteric-coated; Non-EC, non-coated; FIP, Federation Internationale Pharmaceutique; NFU, National Formulary Unit; EPU, European Pharmacopoeia Unit.

\* Conversion factor is shown in Table S4.

† Granules/MT/MS/MMS and EC

‡ Administered with meals and/or snacks if not otherwise mentioned.

§ Antisecretory drugs
