# Supplementary material for: Efficacy of pancreatic enzyme replacement therapy in chronic pancreatitis: systematic review and meta-analysis
Source: PubMed Central journal article supplement (PMC5530474; doi:10.1136/gutjnl-2016-312529), 2016-12-09
Supplement: gutjnl-2016-312529supp004.pdf [file gutjnl-2016-312529supp004.pdf]

**Table S4.** Source of pancreatic enzyme supplements and activity conversion factors

| <b>Study</b>                    | <b>Name and origin of enzyme</b>                                               | <b>Lipase, protease and amylase conversion factor*</b>                        |
|---------------------------------|--------------------------------------------------------------------------------|-------------------------------------------------------------------------------|
| Graham <sup>[32]</sup>          | Ilozyme<br><i>Warren-Teed Pharmaceuticals, USA</i>                             | Ilozyme<br><i>Lipase: 0.36</i>                                                |
|                                 | Pancrease<br><i>Janssen-Cilag (Johnson &amp; Johnson), USA</i>                 | Pancrease<br><i>Lipase: 0.2</i>                                               |
| Dutta et al <sup>[33]</sup>     | Pancreatin<br><i>Eli Lilly &amp; Co., USA</i>                                  | Pancreatin<br><i>Lipase: 0.0684, protease: 0.02</i>                           |
|                                 | Cotazyme<br><i>Organon Inc., USA</i>                                           | Cotazyme<br><i>Lipase: 0.88, protease: 0.26</i>                               |
|                                 | Pancrease TM<br><i>Janssen-Cilag (Johnson &amp; Johnson), USA</i>              | Pancrease TM<br><i>Lipase: 0.49, protease: 0.16</i>                           |
| Lankisch et al <sup>[34]</sup>  | Pankreon <sup>®</sup> 700<br><i>Kali-Chemie Pharme, Germany</i>                | Pankreon <sup>®</sup> 700<br><i>Lipase: 2.8, protease: 2.5, amylase: 2.75</i> |
|                                 | Kreon <sup>®</sup><br><i>Kali-Chemie Pharme, Germany</i>                       | Kreon <sup>®</sup><br><i>Lipase: 1</i>                                        |
| Halgreen et al <sup>[35]</sup>  | Pancrease <sup>®</sup><br><i>Janssen-Cilag (Johnson &amp; Johnson), Sweden</i> | NA                                                                            |
| Gouerou et al <sup>[36]</sup>   | Alipase <sup>®</sup><br><i>Janssen-Cilag (Johnson &amp; Johnson), France</i>   | NA                                                                            |
|                                 | Eurobiol<br><i>Mayoly Spindler, France</i>                                     |                                                                               |
| Jorgensen et al <sup>[37]</sup> | Pancrease <sup>®</sup><br><i>Janssen-Cilag (Johnson &amp; Johnson), Sweden</i> | Pancrease <sup>®</sup><br><i>Lipase: 0.5, protease: 0.55, amylase: 0.36</i>   |
|                                 | Pankreon <sup>®</sup><br><i>Kalichemie, Germany</i>                            | Pankreon <sup>®</sup><br><i>Lipase: 0.8, protease: 0.75, amylase: 1.12</i>    |
|                                 | Pankreatin <sup>®</sup><br><i>Rosco, Denmark</i>                               | Pankreatin <sup>®</sup><br><i>Lipase: 18, protease: 13.29, amylase: 23.91</i> |
| Paris et al <sup>[38]</sup>     | Panzytrat<br><i>Knoll BASF Pharma, Germany</i>                                 | Panzytrat<br><i>Lipase: 2.5, protease: 2.08, amylase: 2.81</i>                |

|                                       |                                                                                                                              |                                                                                                                                                                                                                      |
|---------------------------------------|------------------------------------------------------------------------------------------------------------------------------|----------------------------------------------------------------------------------------------------------------------------------------------------------------------------------------------------------------------|
| Delhaye et al <sup>[39]</sup>         | Pancrease HL<br><i>Janssen-Cilag (Johnson &amp; Johnson), Belgium</i><br><br>Creon<br><i>Solvay Pharmaceuticals, Germany</i> | Pancrease HL<br><i>Lipase: 2.5, protease: 2.08, amylase 2.81</i><br><br>Creon<br><i>Lipase: 0.8, protease: 0.75, amylase: 1.12</i>                                                                                   |
| Opekun et al <sup>[40]</sup>          | Pancrease MT4/MT10/MT16<br><i>McNeil, Consumer Products Co., USA</i>                                                         | Pancrease MT4<br><i>Lipase: 0.4, protease: 0.32, amylase: 0.36</i><br><br>Pancrease MT10<br><i>Lipase: 1, protease: 0.8, amylase: 0.9</i><br><br>Pancrease MT16<br><i>Lipase: 1.6, protease: 1.28, amylase: 1.45</i> |
| Halm et al <sup>[41]</sup>            | Creon 10000 MS/10000 MMS<br><i>Solvay Pharmaceuticals, Germany</i>                                                           | Creon 10000 MS/10000 MMS<br><i>Lipase: 1, protease: 1, amylase: 1</i>                                                                                                                                                |
| O'Keefe et al <sup>[42]</sup>         | Creon 10<br><i>Solvay Pharmaceuticals, USA</i>                                                                               | Creon 10<br><i>Lipase: 1, protease: 1, amylase: 1</i>                                                                                                                                                                |
| Domínguez-Muñoz et al <sup>[43]</sup> | Creon 10000<br><i>Solvay Pharmaceuticals, Germany</i>                                                                        | Creon 10000<br><i>Lipase: 1, protease: 1, amylase: 1</i>                                                                                                                                                             |
| Vecht et al <sup>[44]</sup>           | Pancrease<br><i>Janssen-Cilag (Johnson &amp; Johnson), Netherlands</i>                                                       | Pancrease<br><i>Lipase: 0.5, protease: 0.55, amylase: 0.36</i>                                                                                                                                                       |
| Safdi et al <sup>[45]</sup>           | Creon 10<br><i>Solvay Pharmaceuticals, USA</i>                                                                               | Creon 10<br><i>Lipase: 1, protease: 1, amylase: 1</i>                                                                                                                                                                |
| Whitcomb et al <sup>[46]</sup>        | Creon 12000<br><i>Solvay Pharmaceuticals., USA</i>                                                                           | Creon 12000<br><i>Lipase: 1.2, protease: 1.01, amylase: 1.81</i>                                                                                                                                                     |
| Toskes et al <sup>[47]</sup>          | EUR-1008 (Zenpep)<br><i>Eurand Pharmaceuticals Inc., USA</i>                                                                 | Zenpep 5000<br><i>Lipase: 0.5, protease: 0.45, amylase: 0.81</i><br><br>Zenzep 20000<br><i>Lipase: 2, protease: 1.81, amylase: 3.28</i>                                                                              |
| Thorat et al <sup>[48]</sup>          | Creon 40000<br><i>Abbott Pharmaceutical, Germany</i>                                                                         | Creon 40000<br><i>Lipase: 4, protease: 2.67, amylase: 3.13</i>                                                                                                                                                       |

NA, not available.

\* Conversion factor is based on current dose of enzymes in Kreon 10000.
