# Supplementary material for: Efficacy of pancreatic enzyme replacement therapy in chronic pancreatitis: systematic review and meta-analysis
Source: PubMed Central journal article supplement (PMC5530474; doi:10.1136/gutjnl-2016-312529), 2016-12-09
Supplement: gutjnl-2016-312529supp005.pdf [file gutjnl-2016-312529supp005.pdf]

**Table S5.** Results of sensitivity analyses

|                                                            | No. studies | No. patients |                 | Effect estimate        |          | Heterogeneity      |          |
|------------------------------------------------------------|-------------|--------------|-----------------|------------------------|----------|--------------------|----------|
|                                                            |             |              |                 | WMD/OR (95%CI)         | P value  | I <sup>2</sup> (%) | P value  |
| <b>PERT vs baseline</b>                                    |             |              |                 |                        |          |                    |          |
| <b>CFA:</b>                                                |             | <b>PERT</b>  | <b>Baseline</b> |                        |          |                    |          |
| <i>CP defined by imaging and/or histology</i>              | 4           | 134          | 134             | 0.99 (0.72 to 1.25)    | <0.00001 | 90                 | <0.00001 |
| <i>CP defined by imaging and/or clinical history</i>       | 3           | 63           | 63              | 1.65 (1.21 to 2.09)    | <0.00001 | 93                 | <0.00001 |
| <i>EPI defined by FFE &gt;7-8 g/d</i>                      | 1           | 6            | 6               | NA                     | NA       | NA                 | NA       |
| <i>EPI defined by CFA ≤80% and/or FFE &gt;10-15 g/d</i>    | 7           | 139          | 139             | 2.50 (1.59 to 3.40)    | <0.00001 | 87                 | <0.00001 |
| <i>Studies including patients after pancreatic surgery</i> | 8           | 205          | 205             | 1.96 (1.18 to 2.75)    | <0.00001 | 89                 | <0.00001 |
| <i>Studies with proper run-in phase</i>                    | 9           | 217          | 217             | 2.08 (1.28 to 2.88)    | <0.00001 | 90                 | <0.00001 |
| <b>FFE:</b>                                                |             | <b>PERT</b>  | <b>Baseline</b> |                        |          |                    |          |
| <i>CP defined by imaging and/or histology</i>              | 5           | 169          | 171             | -1.13 (-1.73 to -0.53) | 0.0002   | 81                 | .0003    |
| <i>CP defined by imaging and/or clinical history</i>       | 4           | 78           | 78              | -1.82 (-2.92 to -0.72) | 0.001    | 87                 | <0.0001  |
| <i>EPI defined by FFE &gt;7-8 g/d</i>                      | 2           | 41           | 41              | -1.57 (-3.85 to 0.71)  | 0.18     | 83                 | 0.01     |
| <i>EPI defined by CFA ≤80% and/or FFE &gt;10-15 g/d</i>    | 8           | 154          | 156             | -1.85 (-2.48 to -1.22) | <0.00001 | 80                 | <0.0001  |
| <i>Studies including patients after pancreatic surgery</i> | 9           | 240          | 242             | -1.50 (-2.05 to -0.94) | <0.00001 | 84                 | <0.00001 |
| <i>Studies with proper run-in phase</i>                    | 11          | 267          | 269             | -1.49 (-2.01 to -0.97) | <0.00001 | 84                 | <0.00001 |
| <b>PERT vs placebo</b>                                     |             |              |                 |                        |          |                    |          |
| <b>CFA:</b>                                                |             | <b>PERT</b>  | <b>Placebo</b>  |                        |          |                    |          |
| <i>CP defined by imaging and/or histology</i>              | 2           | 56           | 52              | 1.30 (0.88 to 1.72)    | <0.00001 | 0                  | 0.70     |
| <i>CP defined by imaging and/or clinical history</i>       | 3           | 50           | 42              | 0.85 (0.38 to 1.31)    | 0.0004   | 91                 | <0.0001  |
| <i>EPI defined by FFE &gt;7-8 g/d</i>                      | 0           | NA           | NA              | NA                     | NA       | NA                 | NA       |
| <i>EPI defined by CFA ≤80% and/or FFE &gt;10-15 g/d</i>    | 5           | 107          | 97              | 2.03 (0.90 to 3.17)    | 0.0005   | 90                 | <0.00001 |
| <i>Studies including patients after pancreatic surgery</i> | 4           | 95           | 83              | 1.49 (0.50 to 2.47)    | 0.003    | 87                 | <0.0001  |
| <i>Studies with proper run-in phase</i>                    | 7           | 124          | 114             | 1.67 (0.81 to 2.53)    | 0.0001   | 86                 | <0.00001 |
| <b>FFE:</b>                                                |             | <b>PERT</b>  | <b>Placebo</b>  |                        |          |                    |          |
| <i>CP defined by imaging and/or histology</i>              | 2           | 56           | 52              | -1.20 (-1.61 to -0.78) | <0.00001 | 0                  | .92      |
| <i>CP defined by imaging and/or clinical history</i>       | 3           | 50           | 42              | -1.35 (-2.98 to 0.27)  | 0.10     | 91                 | <0.0001  |
| <i>EPI defined by FFE &gt;7-8 g/d</i>                      | 0           | NA           | NA              | NA                     | NA       | NA                 | NA       |
| <i>EPI defined by CFA ≤80% and/or FFE &gt;10-15 g/d</i>    | 5           | 107          | 97              | -1.90 (-2.97 to -0.82) | 0.0005   | 90                 | <0.00001 |
| <i>Studies including patients after pancreatic surgery</i> | 4           | 95           | 83              | -1.39 (-2.31 to -0.46) | 0.003    | 86                 | <0.0001  |
| <i>Studies with proper run-in phase</i>                    | 7           | 124          | 114             | -1.58 (-2.39 to -0.76) | 0.0001   | 85                 | <0.00001 |

PERT, pancreatic enzyme replacement therapy; WMD, weighted mean difference; OR, odds ratio; CI, confidence interval; CFA, coefficient of fat absorption; CP, chronic pancreatitis; EPI, exocrine pancreatic insufficiency; FFE, faecal fat excretion; NA, not available.
