# Supplementary material for: Efficacy of pancreatic enzyme replacement therapy in chronic pancreatitis: systematic review and meta-analysis
Source: PubMed Central journal article supplement (PMC5530474; doi:10.1136/gutjnl-2016-312529), 2016-12-09
Supplement: gutjnl-2016-312529supp006.pdf [file gutjnl-2016-312529supp006.pdf]

**Table S6.** Results of meta-regression analyses

|                                                |                         | Coefficient (95%CI), <i>P</i> value |                             |                              |                                 |                                  |                                   | Adj R-squared <sup>†</sup> (%) |
|------------------------------------------------|-------------------------|-------------------------------------|-----------------------------|------------------------------|---------------------------------|----------------------------------|-----------------------------------|--------------------------------|
|                                                |                         | Year of publication                 | Gender (men, %)             | Age (year)                   | Study design                    | Study quality                    | Lipase dose/d                     |                                |
| Each covariate fitted into individual model    | <b>PERT vs baseline</b> |                                     |                             |                              |                                 |                                  |                                   |                                |
|                                                | CFA                     | -0.46 (1.15 to 0.23), 0.17          | -0.08 (-0.69 to 0.53), 0.76 | 1.48 (-1.83 to 4.65), 0.35   | -1.92 (-19.57 to 15.73), 0.81   | -9.84 (-27.78 to 8.09), 0.25     | -0.00 (-0.0001 to 0.00), 0.38     |                                |
|                                                | FFE                     | 0.21 (-0.68 to 1.09), 0.62          | 0.49 (-0.11 to 1.1), 0.09   | -0.90 (-5.06 to 3.26), 0.64  | -9.37 (-28.47 to 9.72), 0.3     | 5.28 (-15.14 to 25.71), 0.58     | 0.00 (-0.00002 to 0.0008), 0.27   |                                |
|                                                | <b>PERT vs placebo</b>  |                                     |                             |                              |                                 |                                  |                                   |                                |
|                                                | CFA                     | 0.18 (-0.83 to 1.2), 0.66           | 0.01 (-0.46 to 0.49), 0.94  | 1.13 (-1.63 to 3.89), 0.34   | -4.29 (-29.61 to 21.02), 0.68   | -15.31 (-51.69 to 21.07), 0.33   | -0.00002 (-0.0001 to 0.0001), 0.6 |                                |
|                                                | FFE                     | -0.36 (-1.59 to 0.87), 0.49         | 0.19 (-0.4 to 0.79), 0.41   | -1.94 (-5.31 to 1.42), 0.19  | -1.33 (-30.97 to 28.31), 0.91   | 6.10 (-36.82 to 49.02), 0.73     | 0.00003 (-0.0001 to 0.0002), 0.59 |                                |
| Each covariate fitted into multivariable model | <b>PERT vs baseline</b> |                                     |                             |                              |                                 |                                  |                                   |                                |
|                                                | CFA                     | 1.36 (-18.97 to 21.68), 0.55        | 0.08 (-3.46 to 3.63), 0.82  | 0.98 (-25.22 to 27.19), 0.72 | 33.54 (-232.98 to 300.07), 0.36 | -74.81 (-747.41 to 597.78), 0.39 | -0.00 (-0.001 to 0.001), 0.46     | 23.2                           |
|                                                | FFE                     | -0.46 (-3.17 to 2.24), 0.54         | 0.29 (-0.33 to 0.93), 0.18  | -1.53 (-5.48 to 2.43), 0.24  | -34.69 (-66.27 to -3.12), 0.04  | 52.25 (-39.89 to 144.39), 0.14   | 0.00 (-0.0001 to 0.00016), 0.07   | 94.8                           |
|                                                | <b>PERT vs placebo</b>  |                                     |                             |                              |                                 |                                  |                                   |                                |
|                                                | CFA <sup>‡</sup>        | 2.66 (-6.75 to 12.07), 0.17         | 0.34 (-1.02 to 1.7), 0.19   |                              |                                 |                                  | -0.0002 (-0.0009 to 0.0005), 0.17 | 90.0                           |
|                                                | FFE <sup>‡</sup>        | -3.11 (-11.46 to 5.23), 0.13        | -0.16 (-1.35 to 1.04), 0.34 |                              |                                 |                                  | 0.0003 (-0.0004 to 0.0009), 0.12  | 100                            |

CI, confidence interval; PERT, pancreatic enzyme replacement therapy; CFA, coefficient of fat absorption; FFE, faecal fat excretion.

\*Two-sided *P* value.

†Proportion of variability among studies explained.

‡,§Included covariates in the full model which have more influence in the heterogeneity.
