# Supplementary material for: Efficacy of pancreatic enzyme replacement therapy in chronic pancreatitis: systematic review and meta-analysis
Source: PubMed Central journal article supplement (PMC5530474; doi:10.1136/gutjnl-2016-312529), 2016-12-09

## Supplementary Figure Legends

**Figure S1.** Funnel plots of publication bias for CFA. (A) PERT vs baseline (Begg:  $p=0.46$ , Egger:  $p=0.632$ ), (B) PERT vs placebo (Begg:  $p=0.46$ , Egger:  $p=0.69$ ) and PERT vs PERT including (C) High dose vs low dose (Begg:  $p=0.29$ , Egger:  $p=0.101$ ) and (D) Enteric-coated vs non-coated (Begg:  $p=0.29$ , Egger:  $p=0.101$ ). CFA, coefficient of fat absorption.

**Figure S2.** Funnel plots of publications bias for FFE. (A) PERT vs baseline (Begg:  $p=0.71$ , Egger:  $p=0.16$ ), (B) PERT vs placebo (Begg:  $p=0.29$ ; Egger:  $p=0.36$ ), and PERT vs PERT including (C) High dose vs low dose (Begg:  $p=1$ , Egger:  $p=0.58$ ) and (D) Enteric-coated vs non-coated (Begg:  $p=0.31$ , Egger:  $p=0.22$ ). FFE, fecal fat excretion.

**Figure S1**

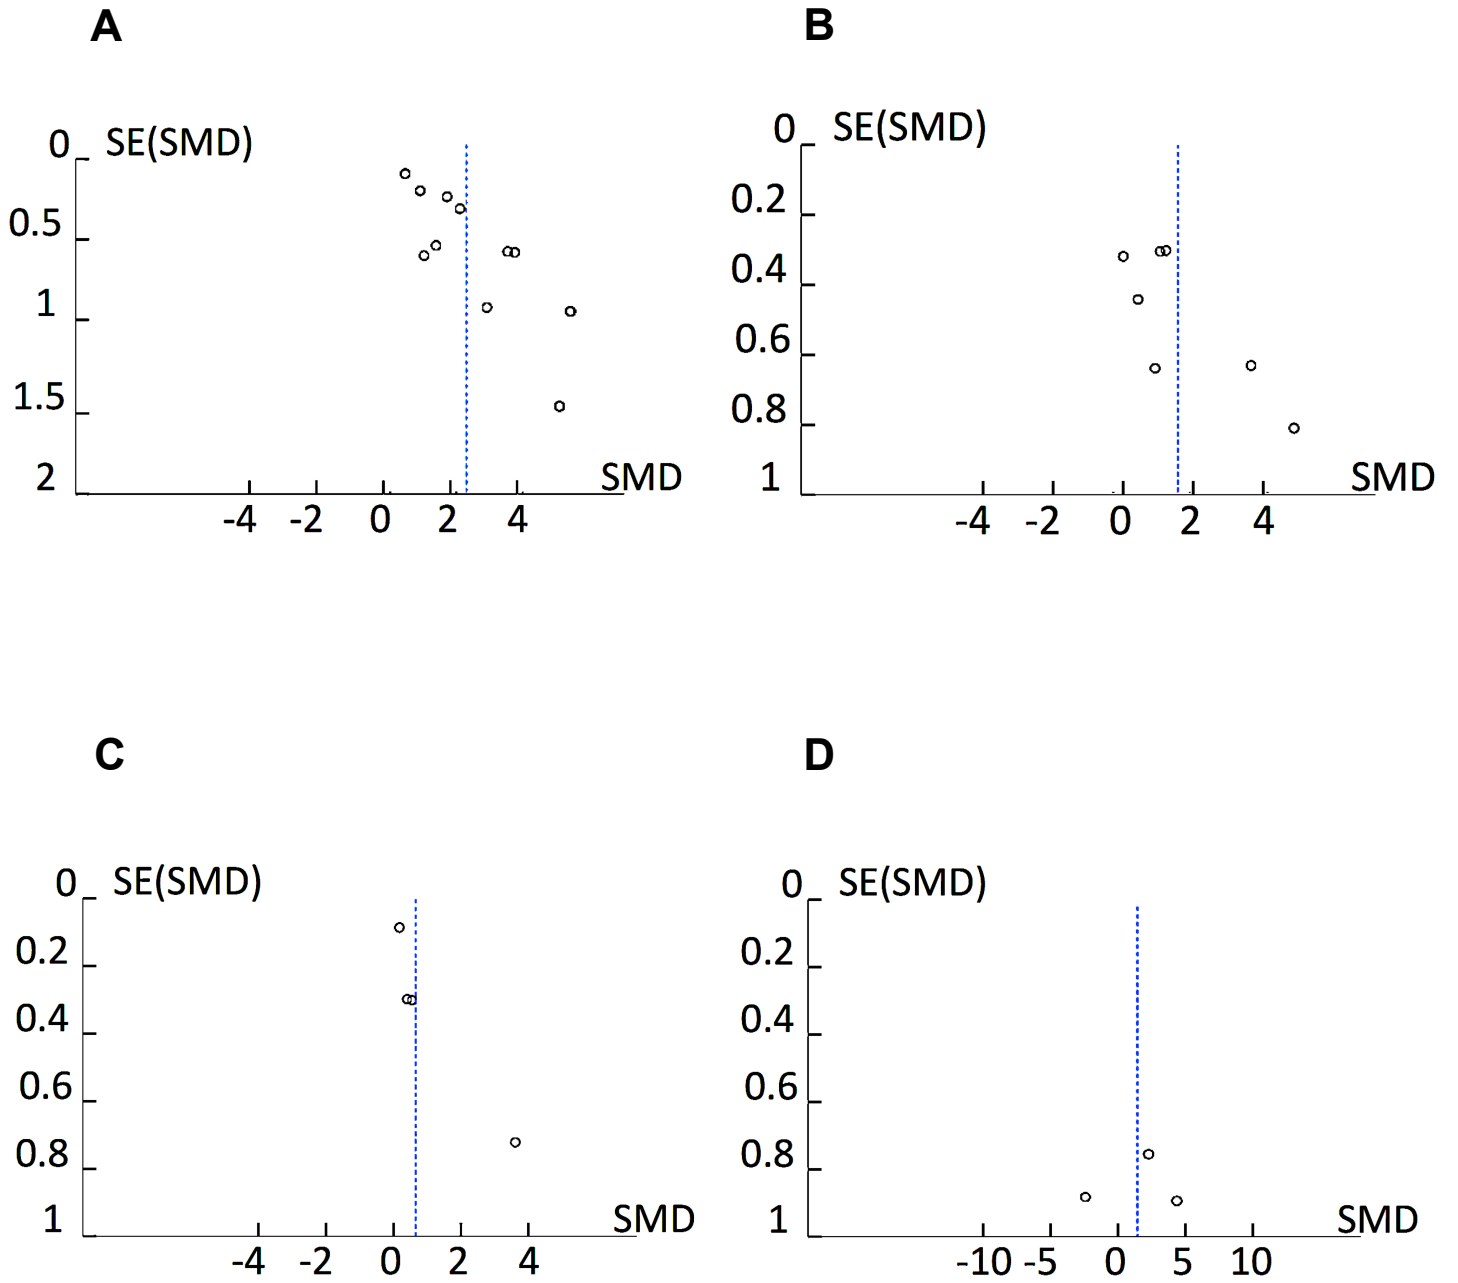

**Figure S2**

**A**

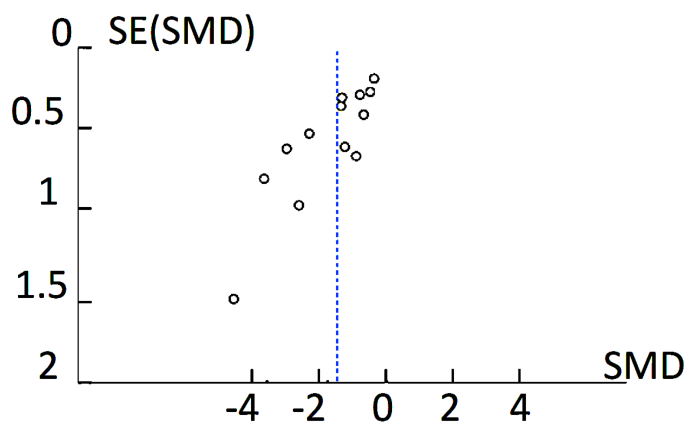

**B**

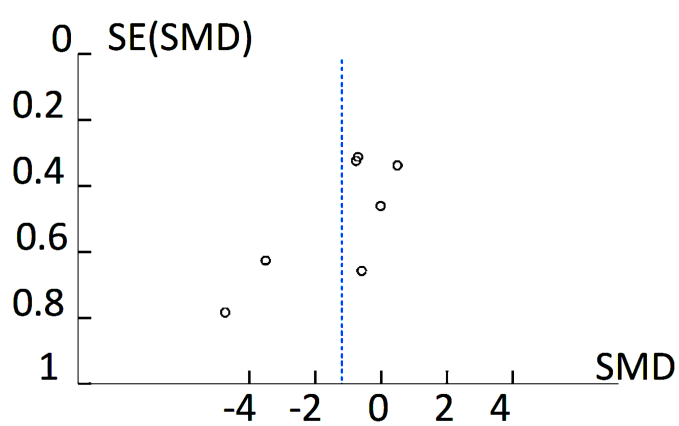

**C**

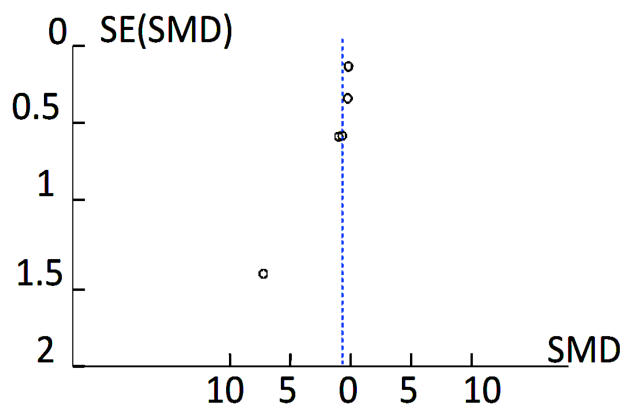

**D**

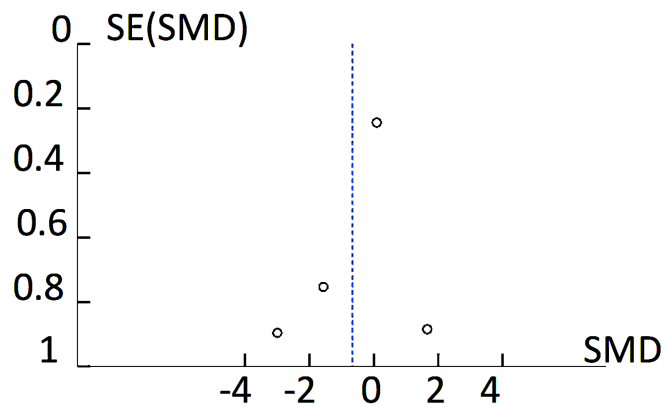

Supplement: gutjnl-2016-312529supp007.pdf [file gutjnl-2016-312529supp007.pdf]
